# Supplementary material
Source: MDPI journal article supplement (https://www.mdpi.com/1999-4907/13/8/1310)
Supplement: s1 [file s1]

Supplementary Material-Tree Cover Improved the Species Diversity of Understory Spontaneous Herbs in a Small City

**Table S1 The spontaneous herbaceous plants recorded in *Julian* city**

| <b>SPECIES</b>                                       | <b>Life-form</b> | <b>Growth-form</b> | <b>Dispersal mode</b> | <b>Chinese endemic or vulnerable plants</b> |
|------------------------------------------------------|------------------|--------------------|-----------------------|---------------------------------------------|
| <i>Duchesnea indica</i>                              | Perennial        | Dwarf              | Animal                | NO                                          |
| <i>Poa annua</i>                                     | Annual           | Dwarf              | Wind                  | NO                                          |
| <i>Rorippa indica</i>                                | Annual           | Tall               | Unassisted            | NO                                          |
| <i>Perilla frutescens</i>                            | Annual           | Tall               | Unassisted            | NO                                          |
| <i>Oplismenus undulatifolius</i>                     | Annual           | Dwarf              | Animal                | NO                                          |
| <i>Plantago asiatica</i>                             | Perennial        | Dwarf              | Animal                | NO                                          |
| <i>Pilea notata</i>                                  | Perennial        | Dwarf              | Unassisted            | NO                                          |
| <i>Polypogon fugax</i>                               | Annual           | Dwarf              | Animal                | NO                                          |
| <i>Mentha canadensis</i>                             | Perennial        | Tall               | Animal                | NO                                          |
| <i>Alternanthera sessilis</i>                        | Annual           | Dwarf              | Wind                  | NO                                          |
| <i>Hydrocotyle sibthorpioides</i>                    | Perennial        | Dwarf              | Animal                | NO                                          |
| <i>Polygonum capitatum</i>                           | Perennial        | Dwarf              | Wind                  | NO                                          |
| <i>Galinsoga parviflora</i>                          | Annual           | Tall               | Wind                  | NO                                          |
| <i>Clinopodium chinense</i>                          | Perennial        | Tall               | Unassisted            | NO                                          |
| <i>Taraxacum mongolicum</i>                          | Perennial        | Dwarf              | Wind                  | NO                                          |
| <i>Stellaria media</i>                               | Annual           | Dwarf              | Wind                  | NO                                          |
| <i>Lolium perenne</i>                                | Perennial        | Dwarf              | Animal                | NO                                          |
| <i>Polygonum persicaria</i><br><i>var.persicaria</i> | Annual           | Dwarf              | Wind                  | NO                                          |
| <i>Rumex acetosa</i>                                 | Perennial        | Tall               | Wind                  | NO                                          |
| <i>Mazus japonicus</i>                               | Annual           | Tall               | Unassisted            | NO                                          |
| <i>Youngia japonica</i>                              | Annual           | Tall               | Wind                  | NO                                          |
| <i>Portulaca oleracea</i>                            | Annual           | Dwarf              | Unassisted            | NO                                          |
| <i>Cryptotaenia japonica</i>                         | Perennial        | Tall               | Unassisted            | NO                                          |
| <i>Oxalis corniculata</i>                            | Perennial        | Dwarf              | Unassisted            | NO                                          |
| <i>Cerastium arvense</i>                             | Perennial        | Tall               | Wind                  | NO                                          |
| <i>Kalimeris indica</i>                              | Perennial        | Tall               | Animal                | NO                                          |
| <i>Sinosenecio oldhamianus</i>                       | Perennial        | Tall               | Unassisted            | NO                                          |
| <i>Conyza canadensis</i>                             | Annual           | Tall               | Wind                  | NO                                          |
| <i>Pilea microphylla</i>                             | Annual           | Dwarf              | Unassisted            | NO                                          |
| <i>Dichondra repens</i>                              | Perennial        | Dwarf              | Unassisted            | NO                                          |
| <i>Pteris cretica</i> <i>var. nervosa</i>            | Perennial        | Tall               | Wind                  | NO                                          |
| <i>Eclipta prostrata</i>                             | Annual           | Tall               | Wind                  | NO                                          |
| <i>Achyranthes bidentata</i>                         | Perennial        | Tall               | Wind                  | NO                                          |
| <i>Vicia sepium</i>                                  | Perennial        | Dwarf              | Unassisted            | NO                                          |

|                                 |           |        |            |    |
|---------------------------------|-----------|--------|------------|----|
| <i>Erigeron annuus</i>          | Annual    | Tall   | Wind       | NO |
| <i>Cyrtomium fortunei</i>       | Perennial | Tall   | Wind       | NO |
| <i>Hydrocotyle nepalensis</i>   | Perennial | Dwarf  | Animal     | NO |
| <i>Juncus prismatocarpus</i>    | Perennial | Dwarf  | Unassisted | NO |
| <i>Myosoton aquaticum</i>       | Annual    | Tall   | Wind       | NO |
| <i>Artemisia argyi</i>          | Perennial | Tall   | Wind       | NO |
| <i>Centella asiatica</i>        | Perennial | Dwarf  | Unassisted | NO |
| <i>Sonchus arvensis</i>         | Perennial | Tall   | Unassisted | NO |
| <i>Pseudognaphalium affine</i>  | Perennial | Dwarf  | Wind       | NO |
| <i>Anredera cordifolia</i>      | Perennial | Linana | Animal     | NO |
| <i>Sagina japonica</i>          | Annual    | Dwarf  | Unassisted | NO |
| <i>Veronica didyma</i>          | Annual    | Dwarf  | Wind       | NO |
| <i>Carpesium abrotanoides</i>   | Perennial | Tall   | Animal     | NO |
| <i>Arthraxon hispidus</i>       | Annual    | Dwarf  | Unassisted | NO |
| <i>Kyllinga polyphylla</i>      | Perennial | Dwarf  | Animal     | NO |
| <i>Pratia nummularia</i>        | Perennial | Dwarf  | Unassisted | NO |
| <i>Ranunculus japonicus</i>     | Perennial | Tall   | Animal     | NO |
| <i>Rotala rotundifolia</i>      | Annual    | Dwarf  | Animal     | NO |
| <i>Blumea balsamifera</i>       | Perennial | Tall   | Animal     | NO |
| <i>Hypericum japonicum</i>      | Perennial | Tall   | Wind       | NO |
| <i>Houttuynia cordata</i>       | Perennial | Tall   | Unassisted | NO |
| <i>Lindernia crustacea</i>      | Annual    | Dwarf  | Other      | NO |
| <i>Geranium wilfordii</i>       | Annual    | Dwarf  | Unassisted | NO |
| <i>Lobelia chinensis</i>        | Perennial | Tall   | Unassisted | NO |
| <i>Potentilla kleiniana</i>     | Perennial | Tall   | Unassisted | NO |
| <i>Equisetum arvense</i>        | Perennial | Tall   | Animal     | NO |
| <i>Cyperus rotundus</i>         | Perennial | Dwarf  | Other      | NO |
| <i>Eleusine indica</i>          | Annual    | Dwarf  | Other      | NO |
| <i>Lysimachia christinae</i>    | Perennial | Dwarf  | Unassisted | NO |
| <i>Acalypha australis</i>       | Annual    | Tall   | Unassisted | NO |
| <i>Gonostegia hirta</i>         | Perennial | Dwarf  | Unassisted | NO |
| <i>Dichrocephala auriculata</i> | Annual    | Tall   | Animal     | NO |
| <i>Iris tectorum</i>            | Perennial | Tall   | Unassisted | NO |
| <i>Setaria viridis</i>          | Annual    | Dwarf  | Animal     | NO |
| <i>Boehmeria spicata</i>        | Perennial | Tall   | Animal     | NO |
| <i>Pterocypsela indica</i>      | Annual    | Tall   | Wind       | NO |
| <i>Aster subulatus</i>          | Annual    | Tall   | Wind       | NO |
| <i>Anemone vitifolia</i>        | Perennial | Tall   | Animal     | NO |
| <i>Microlepidia hancei</i>      | Perennial | Tall   | Wind       | NO |
| <i>Senecio scandens</i>         | Perennial | Tall   | Wind       | NO |
| <i>Digitaria sanguinalis</i>    | Annual    | Dwarf  | Wind       | NO |

|                                                    |           |        |            |         |
|----------------------------------------------------|-----------|--------|------------|---------|
| <i>Conyza bonariensis</i>                          | Annual    | Tall   | Animal     | NO      |
| <i>Amphicarpaea edgeworthii</i>                    | Annual    | Linana | Animal     | NO      |
| <i>Torilis scabra</i>                              | Annual    | Tall   | Animal     | NO      |
| <i>Bidens pilosa</i>                               | Annual    | Tall   | Animal     | NO      |
| <i>Equisetum hyemale</i>                           | Perennial | Tall   | Animal     | NO      |
| <i>Commelina communis</i>                          | Annual    | Dwarf  | Unassisted | NO      |
| <i>Prunella vulgaris</i>                           | Perennial | Tall   | Unassisted | NO      |
| <i>Polygonum perfoliatum</i>                       | Annual    | Linana | Animal     | NO      |
| <i>Coriandrum sativum</i>                          | Perennial | Dwarf  | Unassisted | NO      |
| <i>Oenanthë javanica</i>                           | Perennial | Tall   | Unassisted | NO      |
| <i>Adiantum capillusveneris</i>                    | Perennial | Dwarf  | Wind       | NO      |
| <i>Dioscorea opposita</i>                          | Perennial | Linana | Wind       | NO      |
| <i>Polygonum runcinatum</i> var.<br><i>sinense</i> | Perennial | Tall   | Animal     | Endemic |
| <i>Glechoma longituba</i>                          | Perennial | Dwarf  | Unassisted | NO      |
| <i>Gynura japonica</i>                             | Perennial | Tall   | Wind       | NO      |
| <i>Sedum emarginatum</i>                           | Perennial | Dwarf  | Other      | NO      |
| <i>Viola philippica</i>                            | Perennial | Dwarf  | Animal     | NO      |
| <i>Calystegia hederacea</i>                        | Perennial | Linana | Unassisted | NO      |
| <i>Selaginella uncinata</i>                        | Perennial | Dwarf  | Animal     | Endemic |
| <i>Viola verecunda</i>                             | Perennial | Dwarf  | Animal     | NO      |
| <i>Drosera peltata</i>                             | Perennial | Tall   | Unassisted | NO      |
| <i>Capsella bursapastoris</i>                      | Annual    | Tall   | Animal     | NO      |
| <i>Cyclosorus interruptus</i>                      | Perennial | Tall   | Wind       | NO      |
| <i>Cardamine hirsuta</i>                           | Annual    | Tall   | Wind       | NO      |
| <i>Cyrtomium caryotideum</i>                       | Perennial | Tall   | Wind       | Endemic |
| <i>Ixeris polycephala</i>                          | Annual    | Tall   | Wind       | NO      |
| <i>Lygodium japonicum</i>                          | Annual    | Linana | Wind+Hydro | NO      |
| <i>Trigonotis peduncularis</i>                     | Annual    | Tall   | Animal     | NO      |
| <i>Zoysia japonica</i>                             | Perennial | Dwarf  | Animal     | NO      |
| <i>Spodiopogon sibiricus</i>                       | Perennial | Tall   | Wind       | NO      |
| <i>Amaranthus tricolor</i>                         | Annual    | Tall   | Animal     | NO      |
| <i>Alocasia macrorrhiza</i>                        | Perennial | Tall   | Animal     | NO      |
| <i>Typhonium blumei</i>                            | Perennial | Dwarf  | Animal     | NO      |
| <i>Tropaeolum majus</i>                            | Annual    | Linana | Animal     | NO      |
| <i>Celosia argentea</i> var. <i>cristata</i>       | Perennial | Tall   | Wind       | NO      |
| <i>Mirabilis jalapa</i>                            | Annual    | Tall   | Animal     | NO      |
| <i>Dianthus chinensis</i>                          | Perennial | Tall   | Unassisted | NO      |
| <i>Sedum hispanicum</i>                            | Perennial | Dwarf  | Unassisted | NO      |
| <i>Cyperus alternifolius</i>                       | Perennial | Dwarf  | Wind       | NO      |
| <i>Dendranthema morifolium</i>                     | Annual    | Tall   | Wind       | NO      |
| <i>Verbena officinalis</i>                         | Perennial | Tall   | Unassisted | NO      |

|                                                          |           |        |             |            |
|----------------------------------------------------------|-----------|--------|-------------|------------|
| <i>Sagittaria sagittifolia</i> subsp. <i>leucopetala</i> | Perennial | Tall   | Unassisted  | NO         |
| <i>Ranunculus sceleratus</i>                             | Perennial | Tall   | Unassisted  | NO         |
| <i>Oxalis corymbosa</i>                                  | Perennial | Dwarf  | Unassisted  | NO         |
| <i>Gamochaeta pensylvanica</i>                           | Annual    | Dwarf  | Unassisted  | NO         |
| <i>Imperata cylindrica</i>                               | Perennial | Tall   | Wind        | NO         |
| <i>Elymus dahuricus</i>                                  | Perennial | Tall   | Wind        | NO         |
| <i>Solanum nigrum</i>                                    | Annual    | Dwarf  | Animal      | NO         |
| <i>Phytolacca acinosa</i>                                | Perennial | Tall   | Animal      | NO         |
| <i>Zehneria japonica</i>                                 | Perennial | Linana | Animal      | NO         |
| <i>Pouzolzia zeylanica</i> var. <i>zeylanica</i>         | Perennial | Tall   | Unassisted  | NO         |
| <i>Solanum khasianum</i>                                 | Perennial | Tall   | Animal      | NO         |
| <i>Chenopodium album</i>                                 | Annual    | Tall   | Unassisted  | NO         |
| <i>Phyllanthus urinaria</i>                              | Annual    | Tall   | Unassisted  | NO         |
| <i>Talinum paniculatum</i>                               | Perennial | Tall   | Unassisted  | NO         |
| <i>Asarum sieboldii</i>                                  | Perennial | Dwarf  | Animal+Wind | vulnerable |
| <i>Agastache rugosa</i>                                  | Perennial | Tall   | Unassisted  | NO         |
| <i>Corydalis edulis</i>                                  | Annual    | Dwarf  | Animal      | NO         |
| <i>Solanum lyratum</i>                                   | Perennial | Linana | Animal      | NO         |
| <i>Fagopyrum esculentum</i>                              | Annual    | Tall   | Animal      | NO         |
| <i>Setaria palmifolia</i>                                | Annual    | Tall   | Animal      | NO         |
| <i>Apium graveolens</i>                                  | Perennial | Tall   | Unassisted  | NO         |
| <i>Crassocephalum crepidioides</i>                       | Annual    | Tall   | Unassisted  | NO         |
| <i>Origanum vulgare</i>                                  | Perennial | Tall   | Unassisted  | NO         |
| <i>Paspalum thunbergii</i>                               | Perennial | Dwarf  | Animal      | NO         |
| <i>Justicia procumbens</i>                               | Annual    | Dwarf  | Unassisted  | NO         |
| <i>Polygonum chinense</i>                                | Perennial | Dwarf  | Animal      | NO         |
| <i>Elsholtzia ciliata</i>                                | Perennial | Tall   | Animal      | NO         |
| <i>Smallanthus sonchifolius</i>                          | Perennial | Tall   | Unassisted  | NO         |
| <i>Amaranthus blitum</i>                                 | Annual    | Tall   | Animal      | NO         |
| <i>Pteris multifida</i>                                  | Perennial | Dwarf  | Wind        | NO         |
| <i>Polygonum cuspidatum</i>                              | Perennial | Tall   | Unassisted  | NO         |
| <i>Sedum lineare</i>                                     | Perennial | Dwarf  | Animal      | NO         |
| <i>Pteris ensiformis</i>                                 | Perennial | Tall   | Wind        | NO         |
| <i>Aristolochia debilis</i>                              | Perennial | Linana | Animal+Wind | NO         |
| <i>Impatiens davidi</i>                                  | Annual    | Tall   | Unassisted  | Endemic    |
| <i>Datura stramonium</i>                                 | Perennial | Tall   | Wind        | NO         |
| <i>Ophiopogon bodinieri</i>                              | Perennial | Dwarf  | Animal      | NO         |
| <i>Sonchus asper</i>                                     | Annual    | Tall   | Wind        | NO         |
| <i>Ageratum conyzoides</i>                               | Annual    | Tall   | Animal+Wind | NO         |
| <i>Mosla scabra</i>                                      | Annual    | Dwarf  | Animal      | NO         |
| <i>Cyperus iria</i>                                      | Perennial | Dwarf  | Other       | NO         |

|                                                |           |        |            |    |
|------------------------------------------------|-----------|--------|------------|----|
| <i>Lindernia antipoda</i>                      | Perennial | Dwarf  | Unassisted | NO |
| <i>Torenia fournieri</i>                       | Annual    | Tall   | Unassisted | NO |
| <i>Pogonatherum crinitum</i>                   | Perennial | Dwarf  | Wind       | NO |
| <i>Macleaya cordata</i>                        | Perennial | Tall   | Animal     | NO |
| <i>Gnaphalium affine</i>                       | Annual    | Dwarf  | Wind       | NO |
| <i>Ludwigia prostrata</i>                      | Annual    | Tall   | Wind       | NO |
| <i>Murdannia triquetra</i>                     | Perennial | Dwarf  | Unassisted | NO |
| <i>Helianthus tuberosus</i>                    | Perennial | Tall   | Wind       | NO |
| <i>Cassia tora</i>                             | Annual    | Tall   | Animal     | NO |
| <i>Sonchus oleraceus</i>                       | Annual    | Tall   | Wind       | NO |
| <i>Cayratia japonica</i>                       | Perennial | Linana | Animal     | NO |
| <i>Thyrocarpus sampsonii</i>                   | Annual    | Tall   | Animal     | NO |
| <i>Cyperus glomeratus</i>                      | Annual    | Dwarf  | Animal     | NO |
| <i>Leonurus artemisia</i>                      | Annual    | Tall   | Unassisted | NO |
| <i>Celosia argentea</i>                        | Annual    | Tall   | Wind       | NO |
| <i>Emilia sonchifolia</i>                      | Annual    | Tall   | Wind       | NO |
| <i>Viola hamiltoniana</i>                      | Perennial | Dwarf  | Animal     | NO |
| <i>Parthenocissus tricuspidata</i>             | Annual    | Dwarf  | Unassisted | NO |
| <i>Viola diffusa</i>                           | Annual    | Dwarf  | Animal     | NO |
| <i>Tradescantia pallida</i> (Rose)<br>D.R.Hunt | Perennial | Tall   | Animal     | NO |
| <i>tradescantia fluminensis</i>                | Annual    | Dwarf  | Unassisted | NO |
| <i>Cirsium setosum</i>                         | Perennial | Tall   | Wind       | NO |
| <i>Dendranthema indicum</i>                    | Perennial | Tall   | Wind       | NO |
| <i>Humulus japonica</i>                        | Annual    | Linana | Wind       | NO |
| <i>Polygonum bistorta</i>                      | Perennial | Dwarf  | Unassisted | NO |
| <i>Galium odoratum</i>                         | Annual    | Dwarf  | Unassisted | NO |
| <i>Euphorbia humifusa</i>                      | Annual    | Tall   | Animal     | NO |
| <i>Galium aparine</i> var. <i>tenerum</i>      | Annual    | Linana | Animal     | NO |
| <i>Sedum sarmentosum</i>                       | Perennial | Dwarf  | Unassisted | NO |
| <i>Pharbitis nil</i>                           | Annual    | Linana | Unassisted | NO |
| <i>Macrothelypteris oligophlebia</i>           | Perennial | Tall   | Wind       | NO |
| <i>Petasites japonicus</i>                     | Perennial | Dwarf  | Unassisted | NO |
| <i>Hemerocallis fulva</i>                      | Perennial | Dwarf  | Unassisted | NO |
| <i>Stachys japonica</i>                        | Perennial | Tall   | Unassisted | NO |
| <i>Cibotium barometz</i>                       | Perennial | Tall   | Animal     | NO |
| <i>Urena lobata</i>                            | Perennial | Tall   | Unassisted | NO |
| <i>Diplazium donianum</i>                      | Perennial | Tall   | Wind       | NO |
| <i>Panicum bisulcatum</i>                      | Annual    | Dwarf  | Unassisted | NO |
| <i>Pinellia ternata</i>                        | Perennial | Tall   | Animal     | NO |
| <i>Paraprenanthes sororia</i>                  | Annual    | Tall   | Wind       | NO |
| <i>Solanum xanthocarpum</i>                    | Perennial | Tall   | Animal     | NO |

|                                         |           |        |             |         |
|-----------------------------------------|-----------|--------|-------------|---------|
| <i>Galium bungei</i> var. <i>bungei</i> | Perennial | Linana | Animal      | NO      |
| <i>Alopecurus aequalis</i>              | Annual    | Dwarf  | Wind        | NO      |
| <i>Ophioglossum vulgatum</i>            | Perennial | Dwarf  | Unassisted  | NO      |
| <i>Cynodon dactylon</i>                 | Perennial | Dwarf  | Wind        | NO      |
| <i>Astragalus melilotoides</i>          | Perennial | Tall   | Unassisted  | NO      |
| <i>Artemisia carvifolia</i>             | Annual    | Tall   | Wind        | NO      |
| <i>Pellionia radicans</i>               | Perennial | Dwarf  | Unassisted  | NO      |
| <i>Carex schneideri</i>                 | Perennial | Dwarf  | Animal      | Endemic |
| <i>Siegesbeckia orientalis</i>          | Annual    | Tall   | Animal      | NO      |
| <i>Bidens tripartita</i>                | Annual    | Tall   | Animal      | NO      |
| <i>Hedyotis diffusa</i>                 | Annual    | Dwarf  | Unassisted  | NO      |
| <i>Saxifraga stolonifera</i>            | Perennial | Dwarf  | Animal      | NO      |
| <i>Lepisorus thunbergianus</i>          | Perennial | Dwarf  | Wind        | NO      |
| <i>Onychium japonicum</i>               | Perennial | Tall   | Wind        | NO      |
| <i>Polygonum senticosum</i>             | Annual    | Linana | Unassisted  | NO      |
| <i>Adoxa moschatellina</i>              | Perennial | Dwarf  | Unassisted  | NO      |
| <i>Aristolochia tubiflora</i>           | Perennial | Linana | Unassisted  | Endemic |
| <i>Sambucus chinensis</i>               | Perennial | Tall   | Animal      | NO      |
| <i>Abelmoschus manihot</i>              | Perennial | Tall   | Unassisted  | NO      |
| <i>Davallia mariesii</i>                | Perennial | Tall   | Wind        | NO      |
| <i>Bothriospermum chinense</i>          | Annual    | Tall   | Unassisted  | NO      |
| <i>Polygonum multiflorum</i>            | Perennial | Linana | Animal+Wind | NO      |
| <i>Coix lacrymajobi</i>                 | Annual    | Dwarf  | Unassisted  | NO      |
| <i>Epipremnum aureum</i>                | Perennial | Linana | Unassisted  | NO      |
